# Supplementary material for: Preparation and Biological Activity of the Monoclonal Antibody against the Second Extracellular Loop of the Angiotensin II Type 1 Receptor
Source: Hindawi journal article supplement (doi:10.1155/2016/1858252), 2016-01-01

# Supplementary Figure1

**A**  
Mus musculus angiotensin II receptor, type 1a

MALNSSTEDGIKRIQDDCPRAGRHSYIFVMIPTLYSIIFVVGIFGNSLVVIVYFY  
MKLKTVASVFLNLALADLCFLTLPLWAVYTAMEYRWPFGNHLCIASASV  
SFNLYASVFLLTCLSIDRYLAIVHPMKSRLRRTMLVAKVTCHIIWLMAGLASLPA  
VIHRNVYFIENTNITVCAFHYESRNSTLPIGLGLTKNILGFLFPFLIILTSYTLIWK  
ALKKAYEIQKNKPRNDDIFRIIMAIVLFFFWSVPHQIFTLVDVLIQLGVIHDCCK  
IADIVDTAMPITICIAFYNNCLNPLFYGFLGKKFKKYFLQLLKYIPPKAKSHSSL  
STKMSTLSYRPSDNMSSAAKKPASCSEVE

**B**  
Homo sapiens angiotensin II receptor, type 1

MILNSSTEDGIKRIQDDCPKAGRHNIFVMIPTLYSIIFVVGIFGNSLVVIVYFY  
MKLKTVASVFLNLALADLCFLTLPLWAVYTAMEYRWPFGNLCKIASASV  
SFNLYASVFLLTCLSIDRYLAIVHPMKSRLRRTMLVAKVTCHIIWLLAGLASLPAI  
IHRNVFFIENTNITVCAFHYEQNSTLPIGLGLTKNILGFLFPFLIILTSYTLIWK  
LKKAYEIQKNKPRNDDIFKIIAIVLFFFWSVPHQIFTLVDVLIQLGIIRDCRIAD  
IVDTAMPITICIAFYNNCLNPLFYGFLGKKFKRYFLQLLKYIPPKAKSHSNLSTK  
MSTLSYRPSDNVSSSTKKPAPCFEVE

**C**

Download Graphics Sort by: E value

unnamed protein product  
Sequence ID: Icd|Query\_71157 Length: 359 Number of Matches: 4

Range 1: 165 to 190 Graphics Next Match Previous Match

| Score          | Expect | Identities | Positives  | Gaps     |
|----------------|--------|------------|------------|----------|
| 83.3 bits(189) | 3e-24  | 24/26(92%) | 25/26(96%) | 0/26(0%) |

Query 1 IHRNVFFIENTNITVCAFHYEQNST 26  
IHRNVFFIENTNITVCAFHYESNST  
Sbjct 165 IHRNVYFIENTNITVCAFHYESRNST 190

Supplementary Figure 2

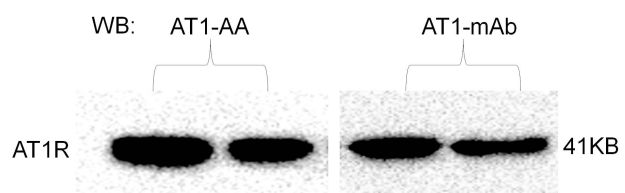

Supplement: f1 [file 1858252.f1.pdf]
